# Supplementary material for: Mechanistic Insight into Salt Tolerance of Acacia auriculiformis: The Importance of Ion Selectivity, Osmoprotection, Tissue Tolerance, and Na+ Exclusion
Source: PubMed Central journal article supplement (PMC5378810; doi:10.3389/fpls.2017.00155), 2017-04-04
Supplement: Image_1.pdf [file Image_1.pdf]

## Supplementary materials

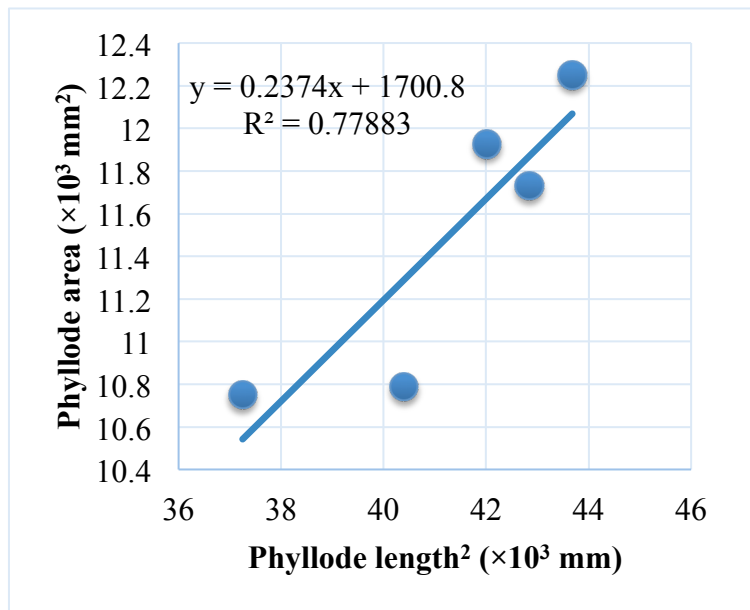

**Supplementary Fig. 1.** Relationship between phyllode length<sup>2</sup> ( $L^2$ ) and phyllode area (PA) of *Acacia auriculiformis* plants grown under control conditions ( $n = 5$  phyllodes). The projected phyllode area was calculated using the regression equation of “ $(0.2374+1700.8) L^2$ ”.

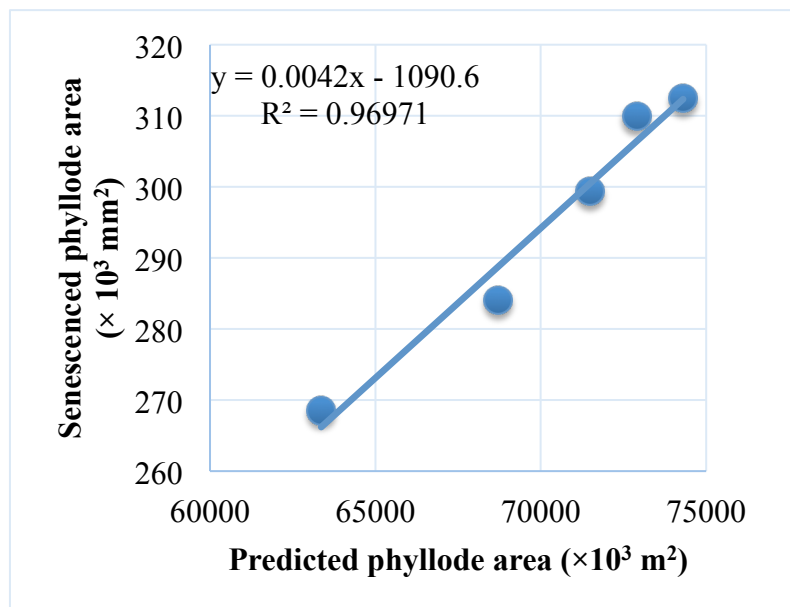

**Supplementary Fig. 2.** Relationship between predicted and senesced phyllode areas of *Acacia auriculiformis* plants grown under control conditions ( $n = 5$  phyllodes). The predicted area of natural senescence in salt-treated plants was calculated using the equation of “ $y = 0.0042x - 1090.6$ ”.
